# Supplementary material for: Beneficial Effect of Polysaccharide Gel Made of Xanthan Gum and Locust Bean Gum on Bovine Oocytes
Source: MDPI journal article supplement (doi:10.3390/ijms24043508), 2023-02-09
Supplement: s1 [file s1]

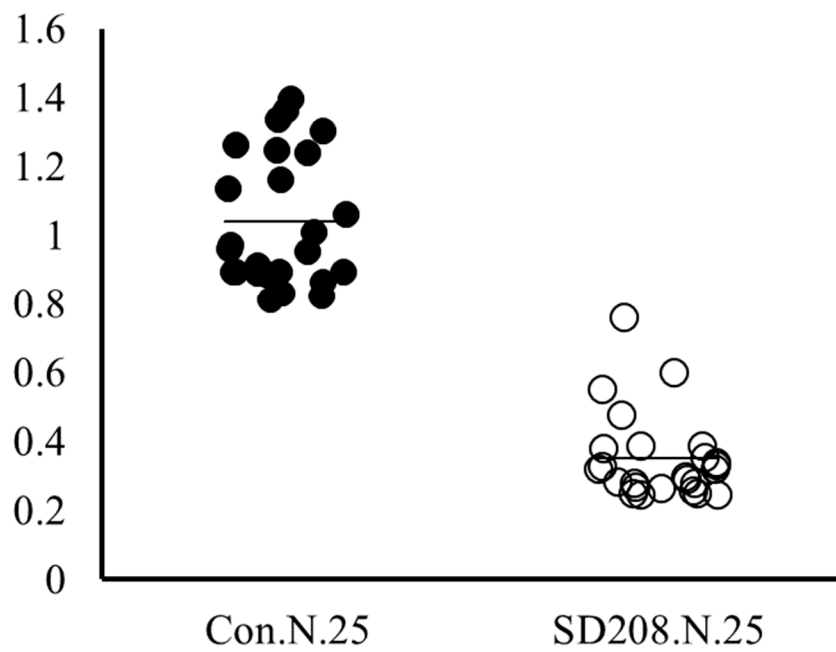

Figure S1. COCs were cultured in IVM medium with or without 2.5  $\mu$ M of SD-208, a novel transforming growth factor beta receptor I kinase inhibitor for 21h and the denuded oocytes were examined F-actin formation as described above. Y axis: expression levels which was normalized by control. N. number of oocytes examined.
