# Supplementary material for: Beneficial Effect of Polysaccharide Gel Made of Xanthan Gum and Locust Bean Gum on Bovine Oocytes
Source: Int J Mol Sci. 2023 Feb 9;24(4):3508. doi: 10.3390/ijms24043508 (PMC9963600; doi:10.3390/ijms24043508)
Supplement: Supplementary file 1 [file ijms-24-03508-s001.zip › supplementary tables.xlsx]

## Sheet: S-Tables
Table S1. Pathways enriched by differerntially expressed genes in cumulus cells between plate and gel culture ssystems				Table S2. Significant upstream regulator of cumulus cells cultured on gel cyltyre system						Table S3. Pathways enriched by differerntially expressed genes in oocytes between plate and gel culture ssystems				Table S4. Significant upstream regulator of oocytes cultured on gel cyltyre system
Term	Count	PValue		Molecule Type	Predicted Activation State	Activation z-score	Flags	p-value of overlap		Term	Count	PValue		Upstream Regulator	Molecule Type	Predicted Activation State	Activation z-score	Flags	p-value of overlap
ECM-receptor interaction	24	5.95175e-09		beta-estradiol	Activated	5.826	bias	3.17e-50		Ribosome	47	3.71682e-14		MYC	transcription regulator	Activated	7.392	bias	3.42e-21
Pathways in cancer	53	1.45031e-06		TGFB1	Activated	7.165		2.93e-47		Parkinson disease	57	1.78512e-10		MYCN	transcription regulator	Activated	3		9.15e-21
Focal adhesion	34	2.16212e-06		dexamethasone	Activated	4.082		1.61e-42		Huntington disease	60	1.06373e-09		beta-estradiol	chemical - endogenous mammalian	Activated	3.75	bias	1.14e-20
Arrhythmogenic right ventricular cardiomyopathy (ARVC)	17	3.54016e-06		TNF	Activated	4.627		4.53e-42		Pathways of neurodegeneration - multiple diseases	80	1.38072e-09		Lh	complex	Activated	4.001	bias	3.15e-19
Steroid biosynthesis	9	2.22934e-05		AGT	Activated	6.23	bias	2.05e-34		Coronavirus disease - COVID-19	54	3.83708e-09		TGFB1	growth factor	Activated	2.748		1.61e-14
Dilated cardiomyopathy	18	4.00861e-05		CG	Activated	4.499	bias	1.91e-33		Prion disease	51	8.60434e-08		ESR1	ligand-dependent nuclear receptor	Activated	3.228		5.94e-13
MAPK signaling pathway	34	0.000157303		PD98059	Inhibited	-5.238	bias	9.41e-32		Amyotrophic lateral sclerosis	62	1.84776e-07		ESR2	ligand-dependent nuclear receptor	Activated	2.958		5.68e-12
Rap1 signaling pathway	30	0.000175271		lipopolysaccharide	Activated	6.403	bias	2.66e-31		Alzheimer disease	62	1.02557e-06		MLXIPL	transcription regulator	Activated	5.444	bias	5.69e-12
Terpenoid backbone biosynthesis	8	0.000390262		IFNG	Activated	5.852	bias	1.02e-30		Thermogenesis	43	1.35607e-06		dihydrotestosterone	chemical - endogenous mammalian	Activated	2.984	bias	3.36e-11
HTLV-I infection	33	0.000776176		tretinoin	Activated	3.597		3.6e-28		Oxidative phosphorylation	30	3.09188e-06		EGF	growth factor	Activated	3.684	bias	1.62e-08
PI3K-Akt signaling pathway	40	0.000785723		IL1B	Activated	5.168		6.91e-28		Chemical carcinogenesis - reactive oxygen species	40	1.97968e-05		metribolone	chemical reagent	Activated	4.856	bias	6.3e-08
Biosynthesis of antibiotics	27	0.00111863		LY294002	Inhibited	-5.177	bias	2.22e-27		Thyroid hormone signaling pathway	23	0.000255147		PRL	cytokine	Activated	2.672	bias	8.31e-08
TNF signaling pathway	17	0.0019444		progesterone	Activated	2.93		4.47e-27		Diabetic cardiomyopathy	34	0.000258791		FOXM1	transcription regulator	Activated	3.212	bias	8.63e-08
Proteoglycans in cancer	26	0.00195734		U0126	Inhibited	-4.479	bias	3.32e-25		Proteasome	13	0.000273963		HRAS	enzyme	Activated	2.005		1.05e-07
Hypertrophic cardiomyopathy (HCM)	14	0.00218534		STAT3	Activated	2.553	bias	6.35e-25		Lysine degradation	16	0.000286087		AR	ligand-dependent nuclear receptor	Activated	3.505	bias	2.72e-07
Cell adhesion molecules (CAMs)	21	0.00289398		PDGF BB	Activated	4.112	bias	1.66e-24		Spinocerebellar ataxia	25	0.000645155		IL4	cytokine	Activated	4.936	bias	3.62e-07
Antigen processing and presentation	13	0.00364228		MAP2K5	Activated	4.991	bias	2.57e-24		Ubiquitin mediated proteolysis	25	0.000957567		AGT	growth factor	Activated	3.724	bias	4.3e-07
Rheumatoid arthritis	15	0.00382764		Tgf beta	Activated	3.897	bias	3.03e-24		Proteoglycans in cancer	31	0.000999398		8-bromo-cAMP	chemical reagent	Activated	2.83	bias	4.61e-07
Fatty acid metabolism	10	0.00384609		forskolin	Activated	4.716	bias	1.44e-23		Gap junction	18	0.00103157		testosterone	chemical - endogenous mammalian	Activated	3.039	bias	6.19e-07
Pertussis	13	0.00454129		HGF	Activated	3.496	bias	1.77e-23		Epstein-Barr virus infection	34	0.00128478		ERBB2	kinase	Activated	2.018	bias	7.57e-07
Leishmaniasis	12	0.00675947		SCAP	Activated	4.687	bias	2.57e-23		Phagosome	27	0.00141706		DDX5	enzyme	Activated	3.357	bias	1.19e-06
Phagosome	20	0.00839633		MAPK7	Activated	3.027	bias	1.63e-22		Carbon metabolism	20	0.00156368		forskolin	chemical toxicant	Activated	4.051	bias	1.76e-06
Complement and coagulation cascades	12	0.00922351		CSF1	Activated	3.636	bias	1.7e-22		Protein export	8	0.00174096		CD3	complex	Activated	4.003	bias	1.85e-06
Leukocyte transendothelial migration	16	0.00961297		INSIG1	Inhibited	-3.936	bias	3.99e-22		Biosynthesis of amino acids	15	0.00193612		arsenite	chemical toxicant	Activated	2.172	bias	4.49e-06
Metabolic pathways	102	0.0124038		IGF1	Activated	3.376	bias	4.62e-22		Retrograde endocannabinoid signaling	24	0.00257141		STK11	kinase	Activated	4.437		5.03e-06
Staphylococcus aureus infection	10	0.0150916		SB203580	Inhibited	-4.177	bias	1.45e-21		Focal adhesion	29	0.00326202		lipopolysaccharide	chemical drug	Activated	2.088	bias	8.3e-06
Oxytocin signaling pathway	18	0.0155344		F2	Activated	4.091	bias	2.25e-21		Non-alcoholic fatty liver disease	25	0.00328495		EIF2AK2	kinase	Activated	2.199	bias	1.38e-05
Ovarian steroidogenesis	9	0.016327		IL6	Activated	4.22	bias	3.14e-21		Platelet activation	20	0.00386931		oblimersen	biologic drug	Activated	2.138	bias	1.76e-05
Chagas disease (American trypanosomiasis)	15	0.0185004		SREBF2	Activated	5.164	bias	3.59e-21		Growth hormone synthesis, secretion and action	19	0.00660329		SYVN1	transporter	Activated	3	bias	1.79e-05
Glycosaminoglycan biosynthesis - heparan sulfate / heparin	6	0.018855		8-bromo-cAMP	Activated	5.861	bias	3.98e-21		Human papillomavirus infection	43	0.00696632		medroxyprogesterone acetate	chemical drug	Activated	2.422	bias	2.12e-05
Salmonella infection	12	0.0208532		FGF2	Activated	4.039	bias	4.21e-21		Cardiac muscle contraction	16	0.00756203		mono-(2-ethylhexyl)phthalate	chemical toxicant	Activated	3.156	bias	2.59e-05
Malaria	9	0.0226679		ESR1	Activated	3.815		7.15e-21		GnRH signaling pathway	16	0.00756203		CEBPB	transcription regulator	Activated	2.795	bias	2.63e-05
Ras signaling pathway	25	0.0229336		medroxyprogesterone acetate	Activated	5.755	bias	2.51e-20		Regulation of actin cytoskeleton	29	0.00938309		HGF	growth factor	Activated	3.656	bias	3.16e-05
Basal cell carcinoma	9	0.0277536		atorvastatin	Activated	3.869		2.82e-20		RNA degradation	14	0.00949147		PDGF BB	complex	Activated	3.101	bias	3.63e-05
Small cell lung cancer	12	0.0285515		lysophosphatidylcholine	Activated	3.214	bias	2.94e-20		Axon guidance	25	0.00986234		thioacetamide	chemical toxicant	Activated	3.336	bias	3.93e-05
Legionellosis	9	0.0335793		bucladesine	Activated	2.766	bias	3.01e-20		Pathways in cancer	60	0.0118213		2-amino-1-methyl-6-phenylimidazo-4-5-b-pyridine	chemical toxicant	Activated	2.887	bias	4.22e-05
Amoebiasis	14	0.034229		EGF	Activated	5.629	bias	4.34e-20		cAMP signaling pathway	31	0.0133544		NR5A1	ligand-dependent nuclear receptor	Activated	2.101	bias	4.62e-05
Wnt signaling pathway	16	0.0380245		CREB1	Activated	2.842		4.78e-20		Cellular senescence	23	0.013942		GLI1	transcription regulator	Activated	2.464	bias	5.21e-05
Signaling pathways regulating pluripotency of stem cells	16	0.042401		OSM	Activated	3.85		5.35e-20		Ras signaling pathway	31	0.0156663		fenamic acid	chemical reagent	Activated	2.898	bias	6.63e-05
Regulation of actin cytoskeleton	22	0.042449		CTNNB1	Activated	3.443	bias	5.43e-20		Circadian entrainment	16	0.0157865		EDN1	cytokine	Activated	2.336	bias	7.08e-05
Hippo signaling pathway	17	0.0425573		SP1	Activated	3.824	bias	8.47e-20		ErbB signaling pathway	14	0.0172375		TCR	complex	Activated	5.089	bias	7.5e-05
Bladder cancer	7	0.046865		dihydrotestosterone	Activated	2.705	bias	1.03e-19		Endocytosis	31	0.0192369		tert-butyl-hydroquinone	chemical reagent	Activated	3.567	bias	7.69e-05
TGF-beta signaling pathway	11	0.0475873		NFkB (complex)	Activated	3.736	bias	1.4e-19		Fc gamma R-mediated phagocytosis	15	0.0223151		PGR	ligand-dependent nuclear receptor	Activated	2.089	bias	8.26e-05
Herpes simplex infection	20	0.0478637		NRG1	Activated	4.098	bias	2.2e-19		Pentose phosphate pathway	7	0.0225035		IGF1R	transmembrane receptor	Activated	3.091	bias	9.78e-05
				SREBF1	Activated	6.06	bias	3.11e-19		Adherens junction	12	0.0245423		2-bromoethylamine	chemical reagent	Activated	2.905	bias	0.000104
				ERBB2	Activated	3.104	bias	6.91e-19		Fluid shear stress and atherosclerosis	20	0.0250933		IFNG	cytokine	Activated	2.392	bias	0.000114
				Akt	Activated	2.028		7.74e-19		Choline metabolism in cancer	15	0.0283524		EGFR	kinase	Activated	3.112	bias	0.000115
				Vegf	Activated	4.311	bias	9.38e-19		HIF- signaling pathway	16	0.0318375		cisplatin	chemical drug	Activated	2.681		0.000122
				INSR	Activated	3.828	bias	1.23e-18		MAPK signaling pathway	34	0.0320029		lomustine	chemical drug	Activated	3.207	bias	0.000128
				hydrogen peroxide	Activated	4.482	bias	1.33e-18		Salmonella infection	31	0.0324335		DAP3	other	Activated	2.449	bias	0.000128
				SMAD3	Activated	3.543	bias	8.49e-18		Hedgehog signaling pathway	10	0.0350569		TP63	transcription regulator	Activated	2.44	bias	0.000137
				(-)-norephedrine	Activated	3.742	bias	1.05e-17		Metabolic pathways	150	0.0352486		triamterene	chemical drug	Activated	2.673	bias	0.000152
				POR	Inhibited	-3.963	bias	1.14e-17		Citrate cycle (TCA cycle)	7	0.0357963		uranyl nitrate	chemical toxicant	Activated	2.189		0.000182
				WNT3A	Activated	2.985	bias	2.75e-17		Wnt signaling pathway	22	0.036258		phenylbutazone	chemical drug	Activated	2.981	bias	0.000207
				F2R	Activated	2.277	bias	3.71e-17		Cortisol synthesis and secretion	11	0.0426221		pirinixic acid	chemical toxicant	Activated	3.601	bias	0.000216
				IKBKB	Activated	2.312	bias	1.02e-16		Aldosterone synthesis and secretion	14	0.0458216		nitrofurantoin	chemical drug	Activated	3.06		0.00022
				prostaglandin E2	Activated	2.946		1.31e-16						GAST	other	Activated	2.5	bias	0.000267
				Interferon alpha	Activated	3.48	bias	1.59e-16						IL3	cytokine	Activated	2.28	bias	0.000276
				VEGFA	Activated	2.856	bias	2.27e-16						carbamazepine	chemical drug	Activated	3.44	bias	0.000281
				poly rI:rC-RNA	Activated	3.123	bias	2.58e-16						NR5A2	ligand-dependent nuclear receptor	Activated	2.626	bias	0.000319
				estrogen	Activated	3.759	bias	3.85e-16						SP1	transcription regulator	Activated	2.942	bias	0.000319
				Mek	Activated	2.895		6.11e-16						methylprednisolone	chemical drug	Activated	2.571		0.000353
				IL13	Activated	3.027	bias	6.93e-16						levodopa	chemical - endogenous mammalian	Activated	4.407		0.000353
				P38 MAPK	Activated	2.423	bias	9.01e-16						ATF4	transcription regulator	Activated	2.686	bias	0.000361
				decitabine	Activated	5.214	bias	9.2e-16						gentamicin C	chemical drug	Activated	2.496	bias	0.000406
				chloropromazine	Activated	2.228	bias	2.06e-15						diclofenac	chemical drug	Activated	3.956	bias	0.000456
				LIF	Activated	2.742		3.05e-15						hexachlorobenzene	chemical toxicant	Activated	2.331	bias	0.000476
				SP600125	Inhibited	-2.919		3.44e-15						NFE2L2	transcription regulator	Activated	3.9	bias	0.000581
				Lh	Activated	2.896	bias	6.01e-15						ERG	transcription regulator	Activated	3.068	bias	0.000629
				IL1A	Activated	2.685	bias	6.01e-15						1,2-dithiol-3-thione	chemical reagent	Activated	4.087	bias	0.000629
				cisplatin	Activated	2.917	bias	1.19e-14						lactacystin	chemical - protease inhibitor	Activated	2.429	bias	0.00069
				AGN194204	Activated	2.888	bias	1.2e-14						EIF4E	translation regulator	Activated	3.284	bias	0.000733
				PGR	Activated	2.73	bias	1.23e-14						SKIL	transcription regulator	Activated	2.061	bias	0.000738
				ERG	Activated	3.962	bias	1.28e-14						D-glucose	chemical - endogenous mammalian	Activated	2.425		0.000902
				cholesterol	Inhibited	-3.328		1.33e-14						CAB39L	kinase	Activated	3	bias	0.000982
				EDN1	Activated	3.083	bias	2.2e-14						tetradecanoylphorbol acetate	chemical drug	Activated	2.903	bias	0.00108
				IL1	Activated	2.947	bias	3.72e-14						ERK	group	Activated	2.086	bias	0.0011
				NGF	Activated	2.699	bias	3.75e-14						allopurinol	chemical drug	Activated	3	bias	0.00119
				MAP2K1	Activated	3.298	bias	3.78e-14						carboplatin	chemical drug	Activated	3.108	bias	0.00127
				D-glucose	Activated	3.712		6.29e-14						MITF	transcription regulator	Activated	3.351	bias	0.00128
				SH3TC2	Activated	3.5	bias	6.7e-14						OPRM1	G-protein coupled receptor	Activated	2		0.00132
				isoquercitrin	Activated	3.44	bias	1.14e-13						KAT2A	enzyme	Activated	2.53	bias	0.00149
				TNFSF11	Activated	3.237	bias	1.2e-13						CD40LG	cytokine	Activated	2.203	bias	0.00196
				OGA	Inhibited	-4.087		1.53e-13						phenacetin	chemical drug	Activated	2.985	bias	0.00209
				ATP7B	Activated	3.153		1.82e-13						lysophosphatidylcholine	chemical - other	Activated	2.377	bias	0.00275
				APP	Activated	2.299	bias	1.85e-13						aflatoxin B1	chemical - endogenous non-mammalian	Activated	3.773	bias	0.00293
				STAT1	Activated	2.739	bias	2.48e-13						CREB1	transcription regulator	Activated	3.237		0.00304
				TP63	Activated	2.401	bias	2.77e-13						CD44	other	Activated	2.417	bias	0.00319
				NORAD	Activated	3.771	bias	3.09e-13						SASH1	other	Activated	3.464	bias	0.0035
				TAZ	Activated	3.093	bias	3.26e-13						TNFAIP2	other	Activated	2.236	bias	0.00375
				FAS	Inhibited	-2.096		5.47e-13						IL2	cytokine	Activated	2.384	bias	0.00404
				Ige	Activated	3.303	bias	5.83e-13						LCK	kinase	Activated	2.889	bias	0.00442
				Pkc(s)	Activated	2.548	bias	6e-13						crocidolite asbestos	chemical toxicant	Activated	2.413	bias	0.00473
				CHUK	Activated	2.739	bias	6.56e-13						hydrogen peroxide	chemical - endogenous mammalian	Activated	2.741	bias	0.00474
				MRTFA	Activated	3.952		9.25e-13						ARNT	transcription regulator	Activated	2.97	bias	0.00479
				tetradecanoylphorbol acetate	Activated	2.199	bias	9.51e-13						bucladesine	chemical toxicant	Activated	2.318	bias	0.00511
				HIF1A	Activated	3.424	bias	1.16e-12						MAP2K1	kinase	Activated	2.483	bias	0.00515
				miR-199a-5p (and other miRNAs w/seed CCAGUGU)	Inhibited	-4.785	bias	1.37e-12						ERK1/2	group	Activated	2.252	bias	0.00519
				TGFB3	Activated	3.246	bias	1.44e-12						OGT	enzyme	Activated	2.172		0.00565
				EGFR	Activated	3.155	bias	1.66e-12						Vegf	group	Activated	2.517	bias	0.00662
				Alpha catenin	Inhibited	-2.961	bias	1.8e-12						SRC	kinase	Activated	3.096	bias	0.00664
				4-hydroxytamoxifen	Activated	2.271	bias	2.24e-12						ZAP70	kinase	Activated	2.534	bias	0.00722
				EIF2AK2	Activated	3.45	bias	2.63e-12						bezafibrate	chemical drug	Activated	2.621	bias	0.00731
				doxorubicin	Activated	2.628		2.91e-12						indomethacin	chemical drug	Activated	2.734		0.00734
				FN1	Activated	2.094	bias	2.91e-12						CD24	other	Activated	2.506	bias	0.008
				FOXO1	Activated	2.603	bias	3.05e-12						LOC105372576	other	Activated	2.646	bias	0.00806
				elaidic acid	Activated	4.217	bias	3.93e-12						SREBF2	transcription regulator	Activated	2.501	bias	0.00839
				RC3H1	Inhibited	-3.638	bias	4.57e-12						captopril	chemical drug	Activated	2.905		0.00839
				MFSD2A	Inhibited	-3.552	bias	4.7e-12						palmitic acid	chemical - endogenous mammalian	Activated	2.833		0.00847
				INSIG2	Inhibited	-3.239	bias	6.45e-12						cocaine	chemical drug	Activated	3.169	bias	0.0089
				CSF2	Activated	3.101	bias	8.77e-12						GNAQ	enzyme	Activated	2	bias	0.00937
				FOXO3	Activated	2.527		9.01e-12						phenylephrine	chemical drug	Activated	2.176	bias	0.0102
				PPARG	Activated	2.572		9.04e-12						CKAP2L	other	Activated	3	bias	0.0104
				PROM1	Inhibited	-2.887		1.04e-11						linoleic acid	chemical - endogenous mammalian	Activated	2.216		0.012
				INS	Activated	2.198		1.15e-11						PCDH11Y	other	Activated	2.236	bias	0.013
				thapsigargin	Activated	2.155	bias	1.25e-11						GF 120918	chemical reagent	Activated	2.236	bias	0.013
				methylprednisolone	Activated	2.806		1.41e-11						KLF4	transcription regulator	Activated	2.062	bias	0.0131
				RPTOR	Activated	3.793	bias	1.82e-11						STAT3	transcription regulator	Activated	2.189	bias	0.0136
				BDNF	Activated	2.859	bias	1.98e-11						MET	kinase	Activated	2.749	bias	0.0138
				diethylstilbestrol	Activated	2.278	bias	2.21e-11						3,4,5,3',4'-pentachlorobiphenyl	chemical toxicant	Activated	2.111	bias	0.0147
				Jnk	Activated	2.76	bias	2.24e-11						FOXO1	transcription regulator	Activated	3.108	bias	0.0148
				IRS1	Activated	3.468	bias	2.69e-11						ionomycin	chemical reagent	Activated	2.183	bias	0.0159
				ezetimibe	Activated	2.878		2.74e-11						TCF7L2	transcription regulator	Activated	5.303	bias	0.0163
				IFNA2	Activated	3.964	bias	2.76e-11						CSF1	cytokine	Activated	3.505	bias	0.0163
				ELK1	Activated	3.273	bias	2.8e-11						PSME3	peptidase	Activated	2	bias	0.0173
				trans-hydroxytamoxifen	Inhibited	-2.191		3.48e-11						(-)-norephedrine	chemical drug	Activated	2	bias	0.0173
				CREBBP	Activated	3.566	bias	4.18e-11						F2	peptidase	Activated	2.637	bias	0.0174
				methotrexate	Activated	2.807		5.54e-11						SHH	peptidase	Activated	2.858	bias	0.0177
				F7	Activated	2.107	bias	5.7e-11						LIF	cytokine	Activated	2		0.018
				GPER1	Activated	3.611	bias	6.51e-11						EGR2	transcription regulator	Activated	2.956	bias	0.0181
				deferoxamine	Activated	2.552	bias	7.93e-11						RNF181	enzyme	Activated	2.449	bias	0.0186
				SIRT2	Activated	2.874	bias	8.11e-11						RAF1	kinase	Activated	2.644	bias	0.0189
				lovastatin	Activated	2.836	bias	8.3e-11						PAF1	other	Activated	2.121	bias	0.0192
				isobutylmethylxanthine	Activated	2.421	bias	9.1e-11						FSHB	other	Activated	2.19	bias	0.0192
				IFN Beta	Activated	3.112	bias	9.71e-11						DOCK8	other	Activated	3.162	bias	0.0209
				L-glutamic acid	Activated	2.513	bias	1.02e-10						MAP2K1/2	group	Activated	2.249	bias	0.0209
				IL2	Activated	2.282	bias	1.16e-10						RPTOR	other	Activated	3.248	bias	0.0216
				KIF3A	Inhibited	-2.747	bias	1.16e-10						phytohemagglutinin	chemical drug	Activated	3.047	bias	0.0228
				Insulin	Activated	4.157		1.21e-10						ADCY	group	Activated	2	bias	0.0229
				IGF2	Activated	2.177	bias	1.24e-10						Pdgf (complex)	complex	Activated	3.36	bias	0.0233
				arsenite	Activated	2.328	bias	1.25e-10						SAMSN1	other	Activated	2.887	bias	0.0241
				losartan potassium	Inhibited	-2.101	bias	1.65e-10						prostaglandin J2	chemical - endogenous mammalian	Activated	2.449	bias	0.0249
				MRTFB	Activated	4.244	bias	1.69e-10						PLAU	peptidase	Activated	2.478	bias	0.025
				mycophenolic acid	Activated	2.466	bias	1.71e-10						Firre	other	Activated	2.111	bias	0.0268
				Pdgf (complex)	Activated	2.14	bias	1.77e-10						SSTR2	G-protein coupled receptor	Activated	2.219		0.027
				SMAD4	Activated	4.828	bias	1.86e-10						ARHGAP21	other	Activated	2.646	bias	0.0281
				let-7a-5p (and other miRNAs w/seed GAGGUAG)	Inhibited	-4.239	bias	2.13e-10						SKP2	other	Activated	2.423		0.0285
				BMP2	Activated	2.856	bias	2.33e-10						CASR	G-protein coupled receptor	Activated	2.5	bias	0.0294
				indomethacin	Activated	3.046		2.67e-10						Z-LLL-CHO	chemical - protease inhibitor	Activated	3.352	bias	0.0297
				RBPJ	Inhibited	-3.116	bias	3.75e-10						HBA1/HBA2	transporter	Activated	2.646	bias	0.0314
				GNAQ	Activated	3.697	bias	4.91e-10						DCAF1	kinase	Activated	2.219	bias	0.0316
				wortmannin	Inhibited	-2.421	bias	5.53e-10						colchicine	chemical drug	Activated	2.398		0.036
				PRL	Activated	3.894	bias	5.68e-10						IL6	cytokine	Activated	2.325	bias	0.0397
				IRF1	Activated	2.988	bias	5.73e-10						FOSB	transcription regulator	Activated	2.168	bias	0.0413
				ATF4	Activated	2.832	bias	6.51e-10						collagen type i (family)	group	Activated	2.144	bias	0.0421
				L-triiodothyronine	Activated	2.453	bias	7.02e-10						PPP1R13L	transcription regulator	Activated	2		0.0466
				MAP3K1	Activated	2.427	bias	7.31e-10						RELA	transcription regulator	Activated	2.054	bias	0.0469
				cigarette smoke	Activated	2.196	bias	8.91e-10						succinic acid	chemical - endogenous mammalian	Activated	2.236		0.0481
				NCOA2	Activated	2.625	bias	9.62e-10						anandamide	chemical - endogenous mammalian	Activated	2.401		0.0573
				PTH	Activated	3.31	bias	1.15e-09						NR4A2	ligand-dependent nuclear receptor	Activated	2.169		0.0666
				SRF	Activated	2.751	bias	1.17e-09						HSPA5	enzyme	Activated	2.59		0.0682
				CNOT7	Inhibited	-2.219	bias	1.27e-09						MMP3	peptidase	Activated	2.69		0.121
				N-cor	Inhibited	-2.172	bias	1.28e-09						methamphetamine	chemical drug	Activated	2.048		0.126
				KLF4	Activated	2.073	bias	1.31e-09						apomorphine	chemical drug	Activated	2		0.128
				NR3C2	Activated	2.508		1.33e-09						streptozocin	chemical drug	Activated	2.061		0.187
				PEX5L	Inhibited	-2.97	bias	1.33e-09						MAPK8	kinase	Activated	2.453		0.202
				IKZF1	Inhibited	-3.009	bias	1.94e-09						vincristine	chemical drug	Activated	2		0.229
				lactacystin	Activated	2.893	bias	1.95e-09						2,4,5,2',4',5'-hexachlorobiphenyl	chemical toxicant	Activated	3		0.37
				bisindolylmaleimide I	Inhibited	-2.885	bias	2.05e-09						levothyroxine	chemical - endogenous mammalian	Activated	2.193		0.426
				GDF9	Activated	3.062	bias	2.24e-09						VDR	transcription regulator	Activated	2.5		0.445
				tributyrin	Activated	2.764	bias	2.38e-09						HOXA3	transcription regulator	Activated	2		0.449
				BRD4	Activated	3.843	bias	2.51e-09						BCL2	transporter	Activated	2.433		0.484
				curcumin	Inhibited	-2.276		3.23e-09						FOXA2	transcription regulator	Activated	2.375		0.532
				EGR1	Activated	2.261	bias	3.44e-09						BMP10	growth factor	Activated	2.236		1
				SRC	Activated	2.094	bias	4.21e-09						RGS4	enzyme	Activated	2		1
				G protein alphai	Activated	3.317	bias	4.41e-09						DIO2	enzyme	Activated	2.433		1
				EPAS1	Activated	2.13	bias	4.76e-09						acetaminophen	chemical drug	Activated	2.017		1
				ANGPT2	Activated	2.783	bias	5.05e-09						10E,12Z-octadecadienoic acid	chemical - endogenous mammalian	Activated	2.607		1
				GLI1	Activated	2.052	bias	5.69e-09						torin1	chemical reagent	Inhibited	-4.543	bias	1.32e-19
				HTT	Activated	2.138		5.72e-09						LARP1	translation regulator	Inhibited	-5.743	bias	2.63e-18
				tacrolimus	Activated	2.739		5.93e-09						RICTOR	other	Inhibited	-6.308	bias	5.72e-14
				RAF1	Activated	3.942	bias	6.42e-09						ST1926	chemical drug	Inhibited	-5.492	bias	1.22e-12
				C4BP	Activated	2.646	bias	6.68e-09						5-fluorouracil	chemical drug	Inhibited	-2.794		6.29e-11
				IKBKG	Activated	2.906	bias	7.65e-09						CD 437	chemical drug	Inhibited	-5.466	bias	7.52e-10
				JAG1	Activated	3.01	bias	8.38e-09						PSEN1	peptidase	Inhibited	-2		2.9e-08
				ITGB3	Activated	2.403	bias	8.68e-09						miR-30c-5p (and other miRNAs w/seed GUAAACA)	mature microRNA	Inhibited	-4.032	bias	1.01e-07
				Ifnar	Activated	2.034	bias	1.18e-08						PD98059	chemical - kinase inhibitor	Inhibited	-3.96	bias	3.85e-07
				cocaine	Activated	3.104	bias	1.48e-08						sirolimus	chemical drug	Inhibited	-6.415	bias	5.87e-07
				lithium chloride	Activated	3.229	bias	1.68e-08						CST5	other	Inhibited	-4.012	bias	1.64e-06
				Gm35986	Inhibited	-2.425	bias	1.72e-08						KDM5A	transcription regulator	Inhibited	-4.2	bias	4.81e-06
				AR	Activated	2.291	bias	1.78e-08						TSC2	other	Inhibited	-2.615	bias	4.57e-05
				pitavastatin	Activated	2.488	bias	2.17e-08						miR-29b-3p (and other miRNAs w/seed AGCACCA)	mature microRNA	Inhibited	-2.252	bias	0.000107
				TAF4B	Activated	2.57	bias	2.17e-08						miR-338-3p (miRNAs w/seed CCAGCAU)	mature microRNA	Inhibited	-2.53	bias	0.000126
				metribolone	Activated	3.741	bias	2.2e-08						miR-450a-5p (and other miRNAs w/seed UUUGCGA)	mature microRNA	Inhibited	-2.53	bias	0.000126
				rosuvastatin	Activated	3.45		2.51e-08						PTPRR	phosphatase	Inhibited	-2.804	bias	0.000135
				IL27	Activated	2.179	bias	2.56e-08						LY294002	chemical - kinase inhibitor	Inhibited	-2.991	bias	0.000138
				Ins1	Activated	3.726	bias	2.69e-08						let-7a-5p (and other miRNAs w/seed GAGGUAG)	mature microRNA	Inhibited	-3.699	bias	0.000182
				TREM1	Activated	2.38	bias	2.73e-08						NR4A1	ligand-dependent nuclear receptor	Inhibited	-2.605		0.000197
				advanced glycation end-products	Activated	2.188	bias	2.78e-08						FMR1	translation regulator	Inhibited	-2.046	bias	0.000209
				NPPB	Inhibited	-2.573	bias	3.77e-08						NUPR1	transcription regulator	Inhibited	-2.293		0.000267
				cyclic AMP	Activated	2.596	bias	4.26e-08						mir-210	microRNA	Inhibited	-2.668	bias	0.000322
				prexasertib	Activated	3.153	bias	4.48e-08						GSKJ4	chemical reagent	Inhibited	-3.873	bias	0.000376
				MBTPS1	Activated	2.138	bias	4.52e-08						CPT1B	enzyme	Inhibited	-4.309		0.000455
				CYP51A1	Inhibited	-2.828	bias	4.52e-08						miR-335-3p (miRNAs w/seed UUUUCAU)	mature microRNA	Inhibited	-2.121	bias	0.000485
				IL3	Activated	2.734	bias	4.95e-08						WWC1	transcription regulator	Inhibited	-2.236		0.000859
				SMAD1	Activated	2.226	bias	5.14e-08						miR-205-5p (and other miRNAs w/seed CCUUCAU)	mature microRNA	Inhibited	-2.415	bias	0.00102
				EP300	Activated	2.264	bias	5.25e-08						imatinib	chemical drug	Inhibited	-2.153		0.00112
				DYSF	Inhibited	-2.779	bias	6.27e-08						miR-182-5p (and other miRNAs w/seed UUGGCAA)	mature microRNA	Inhibited	-2.358	bias	0.00141
				2-amino-5-phosphonovaleric acid	Inhibited	-2.626		6.91e-08						MXD1	transcription regulator	Inhibited	-2.887	bias	0.00152
				PROC	Inhibited	-2.039		6.91e-08						miR-1-3p (and other miRNAs w/seed GGAAUGU)	mature microRNA	Inhibited	-3.555	bias	0.00191
				CEBPB	Activated	3.886	bias	7.66e-08						let-7	microRNA	Inhibited	-4.357	bias	0.0029
				YAP1	Activated	3.468	bias	8.5e-08						selenomethylselenocysteine	chemical - endogenous mammalian	Inhibited	-2.449	bias	0.00323
				HOXA5	Activated	2.183	bias	1.15e-07						MAP4K4	kinase	Inhibited	-3.637	bias	0.00339
				carbon tetrachloride	Activated	2.981	bias	1.18e-07						salirasib	chemical drug	Inhibited	-2.538	bias	0.00377
				SB 216763	Activated	2.126	bias	1.22e-07						NFKBIA	transcription regulator	Inhibited	-2.229		0.00378
				CSF1R	Activated	2.164	bias	1.27e-07						RC3H1	enzyme	Inhibited	-2.309	bias	0.00394
				GDF2	Activated	2.088	bias	1.54e-07						androgen	chemical drug	Inhibited	-2.722		0.00429
				pirinixic acid	Activated	3.322	bias	1.74e-07						PKD1	ion channel	Inhibited	-2.344		0.00432
				PTK2	Activated	3.101	bias	1.77e-07						glutamyl-Se-methylselenocysteine	chemical - endogenous mammalian	Inhibited	-2.236	bias	0.00501
				IL1RN	Inhibited	-2.564	bias	1.85e-07						mir-122	microRNA	Inhibited	-2.79	bias	0.00502
				EGR2	Activated	2.898	bias	1.94e-07						CLPP	peptidase	Inhibited	-3.317	bias	0.00502
				CD3	Activated	2.005	bias	1.96e-07						mir-1	microRNA	Inhibited	-2.633	bias	0.00568
				CDK19	Inhibited	-3.441	bias	2.1e-07						mir-30	microRNA	Inhibited	-2.915	bias	0.0062
				IFNL1	Activated	3.328	bias	2.64e-07						miR-16-5p (and other miRNAs w/seed AGCAGCA)	mature microRNA	Inhibited	-3.111	bias	0.00747
				MAPK3	Activated	2.92	bias	2.64e-07						CDK4/6	group	Inhibited	-2.111		0.00981
				CAV1	Activated	2.64		2.65e-07						miR-483-3p (miRNAs w/seed CACUCCU)	mature microRNA	Inhibited	-2.81	bias	0.0117
				collagenase	Activated	2.714	bias	2.73e-07						miR-155-5p (miRNAs w/seed UAAUGCU)	mature microRNA	Inhibited	-2.86	bias	0.0119
				clozapine	Activated	3.638	bias	2.84e-07						ABCB1	transporter	Inhibited	-2.646	bias	0.0129
				Map3k7	Activated	2.062	bias	3.39e-07						WNT3A	cytokine	Inhibited	-2.096	bias	0.0143
				Ras homolog	Activated	2.178		3.77e-07						mir-8	microRNA	Inhibited	-2.943	bias	0.0159
				SMARCB1	Activated	2.428	bias	4.12e-07						Abcb1b	transporter	Inhibited	-2.236	bias	0.0159
				oblimersen	Activated	3.208	bias	4.47e-07						mir-25	microRNA	Inhibited	-2.407	bias	0.0194
				BRCA1	Activated	2.388		4.61e-07						ETV6-RUNX1	fusion gene/product	Inhibited	-2.457	bias	0.0229
				miR-30c-5p (and other miRNAs w/seed GUAAACA)	Inhibited	-3.912	bias	4.66e-07						napabucasin	chemical drug	Inhibited	-2.333	bias	0.0328
				Mapk	Activated	2.903	bias	4.76e-07						ARHGDIG	other	Inhibited	-2	bias	0.0329
				E. coli B4 lipopolysaccharide	Activated	2.047	bias	4.99e-07						GFI1	transcription regulator	Inhibited	-2.53	bias	0.0365
				TO-901317	Activated	2.219		5.3e-07						flutamide	chemical drug	Inhibited	-2.138		0.0374
				PTPN3	Activated	2.994	bias	6.08e-07						EGLN1	enzyme	Inhibited	-2.223		0.0391
				TGFA	Activated	2.626	bias	6.5e-07						IND S7	chemical - kinase inhibitor	Inhibited	-2.236		0.0421
				NEUROG1	Inhibited	-2.324		6.9e-07						ACOX1	enzyme	Inhibited	-2.5		0.046
				desoxycorticosterone	Activated	2.396	bias	7.11e-07						nitrofen	chemical toxicant	Inhibited	-2.449	bias	0.0463
				mir-29	Inhibited	-2.069	bias	7.6e-07						MEL S3	chemical - kinase inhibitor	Inhibited	-2.236		0.0481
				RAS	Activated	2.758	bias	8.59e-07						1810019D21Rik	other	Inhibited	-2.121		0.0515
				ATF2	Activated	3.411	bias	8.97e-07						PRKCG	kinase	Inhibited	-2.121		0.0515
				BMP15	Activated	2.476		9.54e-07						IND S1	chemical - kinase inhibitor	Inhibited	-2		0.0631
				PAX3-FOXO1	Inhibited	-2.073		9.97e-07						Pde4	group	Inhibited	-2		0.0723
				8-bromoguanosine 3',5'-cyclic monophosphate	Activated	2.191		1.05e-06						HDAC1	transcription regulator	Inhibited	-2.391		0.145
				BMP6	Activated	3.206	bias	1.13e-06						mir-132	microRNA	Inhibited	-2		0.154
				DAP3	Activated	2.646	bias	1.14e-06						TXNIP	other	Inhibited	-2.236		0.366
				LYL1	Activated	2.219		1.22e-06
				aflatoxin B1	Activated	3	bias	1.24e-06
				IGF1R	Activated	2.507	bias	1.24e-06
				isoproterenol	Activated	2.708	bias	1.26e-06
				LLGL2	Activated	2.53	bias	1.33e-06
				Z-LLL-CHO	Activated	3.09	bias	1.4e-06
				SIRT3	Inhibited	-2.598		1.4e-06
				aldosterone	Activated	2.854	bias	1.41e-06
				SRC (family)	Activated	2.952	bias	1.44e-06
				NTRK1	Activated	2.412	bias	1.46e-06
				l-asparaginase	Inhibited	-4.025	bias	1.55e-06
				GH1	Activated	2.182		1.78e-06
				VTN	Activated	2.097	bias	1.88e-06
				6,7-dinitroquinoxaline-2,3-dione	Activated	2	bias	1.95e-06
				Srebp	Activated	2.4	bias	2.02e-06
				RB1	Inhibited	-2.313		2.16e-06
				TGFBR1	Activated	3.211	bias	2.17e-06
				MTORC1	Activated	2.353	bias	2.28e-06
				NSUN6	Activated	2.714	bias	2.56e-06
				GNRH	Activated	2.873	bias	2.56e-06
				SOCS1	Inhibited	-2.892	bias	2.68e-06
				ETS2	Activated	2.236	bias	2.75e-06
				VDR	Activated	2.613		2.93e-06
				NONO	Activated	2.988	bias	3.27e-06
				BMP4	Activated	2.626	bias	3.51e-06
				LMNB1	Inhibited	-2.813	bias	3.54e-06
				ALOX15	Activated	2.241	bias	3.57e-06
				norepinephrine	Activated	2.799	bias	3.71e-06
				GSTO1	Inhibited	-2.704	bias	3.89e-06
				bicuculline	Activated	3.514	bias	4.37e-06
				MEIS2	Activated	2.359	bias	4.55e-06
				GNRH1	Activated	2.504	bias	5.37e-06
				ACE2	Inhibited	-2.155		6.45e-06
				phytohemagglutinin	Activated	2.882	bias	6.48e-06
				PRKCB	Activated	2.717	bias	6.57e-06
				LEF1	Activated	3.12	bias	6.66e-06
				PDE8A	Inhibited	-2	bias	6.69e-06
				trovafloxacin	Activated	2.138	bias	6.81e-06
				cis-urocanic acid	Activated	2.228	bias	7.44e-06
				RPS6KA5	Activated	2.594		7.44e-06
				dalfampridine	Activated	3.576	bias	8e-06
				5-azacytidine	Activated	3.241	bias	8.71e-06
				MMP9	Activated	2.01		9.19e-06
				miR-17-5p (and other miRNAs w/seed AAAGUGC)	Inhibited	-3.276	bias	9.71e-06
				CCN5	Inhibited	-2.111		1.1e-05
				HDL-cholesterol	Inhibited	-3.162	bias	1.11e-05
				SYVN1	Activated	4.146	bias	1.18e-05
				STAT4	Activated	3.726	bias	1.19e-05
				BBP-398	Inhibited	-2.449	bias	1.22e-05
				PPARGC1B	Activated	3.091	bias	1.36e-05
				CEBPD	Activated	2.407	bias	1.47e-05
				PRKAA2	Inhibited	-2.247	bias	1.48e-05
				IPMK	Activated	2.16	bias	1.56e-05
				crocidolite asbestos	Activated	2.799	bias	1.63e-05
				FGF10	Activated	3.286	bias	1.65e-05
				gentamicin C	Activated	2.496	bias	1.68e-05
				fenofibrate	Activated	2.575		1.7e-05
				tert-butyl-hydroquinone	Activated	2.103	bias	1.99e-05
				kaempferol	Inhibited	-2.156	bias	2.2e-05
				androgen	Inhibited	-2.584		2.22e-05
				TCF7L2	Activated	2.888	bias	2.23e-05
				triamterene	Activated	2.496	bias	2.38e-05
				CBX5	Inhibited	-4	bias	2.58e-05
				MEF2D	Activated	2.015	bias	2.6e-05
				tanespimycin	Inhibited	-2.661	bias	2.61e-05
				2-bromoethylamine	Activated	2.111	bias	2.78e-05
				H-7	Inhibited	-2.073	bias	2.98e-05
				PNPT1	Inhibited	-2.967	bias	3.4e-05
				IL5	Activated	3.283	bias	3.48e-05
				DDX58	Activated	2.125	bias	3.52e-05
				AREG	Activated	2.523		3.52e-05
				NPC1L1	Inhibited	-2.236	bias	3.6e-05
				SAV1	Inhibited	-2.433	bias	3.77e-05
				fenamic acid	Activated	2.554	bias	3.91e-05
				TFRC	Inhibited	-2.535	bias	4.04e-05
				TSC22D3	Activated	2.802		4.14e-05
				SATB1	Inhibited	-2.434		4.18e-05
				cephaloridine	Activated	2.018	bias	4.38e-05
				EWSR1-FLI1	Inhibited	-2.424	bias	4.71e-05
				PSMB11	Inhibited	-2.871	bias	5.11e-05
				SPINT1	Inhibited	-2.425	bias	5.79e-05
				mir-21	Inhibited	-2.096	bias	6.01e-05
				IRGM	Inhibited	-2.525	bias	6.04e-05
				GnRH-A	Activated	3.086		6.23e-05
				mir-1	Inhibited	-2.626	bias	6.42e-05
				MITF	Activated	3.099	bias	6.55e-05
				gossypol	Activated	2.186		6.9e-05
				A2M	Activated	2.553	bias	7.04e-05
				nicotine	Activated	2.295	bias	7.17e-05
				PAX7	Activated	3.248	bias	7.23e-05
				calcimycin	Activated	2.16	bias	8.03e-05
				miR-182-5p (and other miRNAs w/seed UUGGCAA)	Inhibited	-3.422	bias	8.09e-05
				mir-15	Inhibited	-2.488	bias	8.21e-05
				farnesyl pyrophosphate	Activated	2.425		8.87e-05
				ACACB	Inhibited	-2.433	bias	8.87e-05
				GAS2L3	Inhibited	-2.433	bias	8.87e-05
				3,4,5,3',4'-pentachlorobiphenyl	Activated	2.143	bias	9.37e-05
				lomustine	Activated	2.309	bias	9.46e-05
				GLI3	Activated	2.537		9.93e-05
				SP110	Inhibited	-2.065		0.0001
				STEAP3	Inhibited	-2.72	bias	0.000103
				NADPH oxidase	Activated	2.2	bias	0.000104
				C11orf95-RELA	Activated	2.53	bias	0.000104
				SMARCA5	Inhibited	-2.357	bias	0.000106
				amphetamine	Activated	2.862	bias	0.000107
				GAST	Activated	3.66	bias	0.000107
				miR-155-5p (miRNAs w/seed UAAUGCU)	Inhibited	-2.783	bias	0.000112
				RLIM	Activated	2.236	bias	0.000121
				CHRM3	Activated	2.219	bias	0.000121
				EPHB1	Activated	2.189	bias	0.000121
				MBOAT7	Inhibited	-2.219	bias	0.000121
				let-7	Inhibited	-2.841	bias	0.000123
				sodium arsenite	Activated	2.234		0.000128
				olanzapine	Activated	2.357		0.000142
				IFNA1/IFNA13	Activated	2.133	bias	0.000143
				NTRK2	Activated	2.343	bias	0.000146
				miR-145-5p (and other miRNAs w/seed UCCAGUU)	Inhibited	-2.37	bias	0.000149
				ARNT	Activated	2.406	bias	0.000151
				betulinic acid	Inhibited	-2.153	bias	0.000155
				APEX1	Activated	2.224	bias	0.000155
				ALDH1A2	Inhibited	-2.121		0.000155
				4-methylnitrosoamino-1-(3-pyridinyl)-1-butanone	Activated	2.498	bias	0.000179
				S1PR2	Activated	2.409	bias	0.000188
				TRIM24	Inhibited	-3.357	bias	0.000194
				TAS4464	Activated	2.135	bias	0.000196
				phorbol esters	Activated	2.084	bias	0.000198
				DBI	Activated	2.236	bias	0.000199
				CASR	Activated	3.308	bias	0.000209
				palbociclib	Activated	3.162		0.000214
				TEAD2	Activated	3.162	bias	0.000214
				ribavirin	Activated	2.63	bias	0.000217
				IKZF3	Inhibited	-2.887	bias	0.000227
				QKI	Activated	2.023	bias	0.000228
				IRF7	Activated	3.901	bias	0.000236
				PLAT	Activated	2.205	bias	0.000245
				PPP3CA	Activated	2.214	bias	0.000245
				lipid	Inhibited	-2.449		0.000262
				mir-96	Activated	2.333		0.000262
				BAP1	Inhibited	-2.401		0.000263
				2-deoxyglucose	Activated	2.779		0.000297
				IKK (complex)	Inhibited	-2.18		0.000303
				aristolochic acid I	Inhibited	-2		0.00031
				CSF2RA	Activated	2.216	bias	0.00031
				SKIL	Activated	2.377	bias	0.000315
				miR-124-3p (and other miRNAs w/seed AAGGCAC)	Inhibited	-3.743	bias	0.000323
				SOX4	Activated	3.214	bias	0.000329
				napabucasin	Inhibited	-2.111	bias	0.000353
				KCNJ10	Activated	2.449	bias	0.00036
				miR-450a-5p (and other miRNAs w/seed UUUGCGA)	Inhibited	-2.828	bias	0.000373
				Hif1	Activated	2.177	bias	0.000436
				GNAS	Activated	2.66	bias	0.000436
				NFATC3	Activated	2.549	bias	0.000465
				miR-29b-3p (and other miRNAs w/seed AGCACCA)	Inhibited	-2.11	bias	0.000497
				NCOA3	Activated	2.676	bias	0.000555
				Ngf	Activated	2.989	bias	0.000604
				aldesleukin	Activated	2.138	bias	0.000621
				MKNK1	Activated	3.207	bias	0.000657
				24-hydroxycholesterol	Inhibited	-2.2		0.000664
				AIMP1	Inhibited	-2.2	bias	0.000664
				ESRRA	Activated	2.227	bias	0.000666
				L-cysteine	Activated	2	bias	0.000686
				mir-133	Inhibited	-2.144	bias	0.000778
				phenylephrine	Activated	2.273	bias	0.000787
				LG100268	Activated	2.234		0.000791
				JAK1/2	Activated	2.72	bias	0.000879
				CSF2RB	Activated	2.213	bias	0.000926
				OSBPL8	Activated	2.2	bias	0.000926
				NR1I2	Activated	2.243		0.000935
				NFE2L2	Activated	2.233	bias	0.000967
				miR-27a-3p (and other miRNAs w/seed UCACAGU)	Inhibited	-2.241	bias	0.000983
				TEAD1	Activated	2.525	bias	0.00099
				ADCY	Activated	2	bias	0.00105
				MLX	Activated	2.173	bias	0.00105
				PEA15	Activated	2		0.0011
				IRS2	Activated	2.188		0.00111
				KDM8	Activated	3.162	bias	0.00111
				2,3,4,7,8-pentachlorodibenzofuran	Activated	2.158		0.00114
				TEAD3	Activated	3	bias	0.00114
				Brd4	Activated	2.137	bias	0.00125
				USP22	Inhibited	-2.183	bias	0.0013
				EWSR1	Activated	2.598	bias	0.0014
				SETD2	Inhibited	-2.828		0.00152
				Il3	Activated	2.16		0.00156
				haloperidol	Activated	2.964	bias	0.00165
				BAG1	Activated	2.219	bias	0.00165
				ST3-Hel2A-2	Activated	2	bias	0.00166
				MYZAP	Activated	2		0.00166
				SU6656	Inhibited	-2.449	bias	0.00167
				FMO3	Activated	2.236	bias	0.00167
				ETV6-RUNX1	Inhibited	-3.522	bias	0.00174
				U73122	Inhibited	-2.184	bias	0.00177
				phosphate	Activated	2.726		0.00184
				FGF7	Activated	2.733	bias	0.00193
				GFI1	Inhibited	-3.19	bias	0.00194
				EIF2AK4	Activated	2.015	bias	0.00199
				eflornithine	Activated	2.742		0.00205
				SYK	Inhibited	-3.057		0.00214
				CREBZF	Inhibited	-2.186	bias	0.00217
				hydroxyurea	Activated	2.549	bias	0.00223
				4-hydroxynonenal	Activated	2.57		0.00236
				GSKJ4	Inhibited	-2.111	bias	0.00237
				8-hydroxyeicosapentaenoic acid	Activated	2		0.00238
				NELFB	Inhibited	-2		0.00238
				ELOVL5	Inhibited	-2.426	bias	0.00247
				mir-122	Inhibited	-2.998	bias	0.00265
				quinolinic acid	Activated	2.765		0.00271
				prazosin	Inhibited	-2	bias	0.00277
				E2F1	Activated	2.473	bias	0.00293
				JQ1	Inhibited	-2.291	bias	0.00321
				potassium chloride	Activated	2.776	bias	0.00335
				GDNF	Activated	2.351	bias	0.00342
				cholecalciferol	Activated	2.346	bias	0.00345
				PCDH11Y	Activated	2.213	bias	0.00349
				SRA1	Activated	2.19	bias	0.00349
				PARG	Inhibited	-2.138		0.00349
				TFE3	Activated	2.132	bias	0.00352
				ADAMTS18	Activated	2.425	bias	0.00357
				Ifn	Activated	2.454	bias	0.0037
				flutamide	Inhibited	-2.114		0.00377
				ASPSCR1-TFE3	Activated	2.887	bias	0.00377
				KDM3B	Inhibited	-2.121	bias	0.00378
				candesartan	Inhibited	-2.784	bias	0.004
				H2AB3 (includes others)	Activated	2.121	bias	0.004
				GHRL	Activated	2.592		0.00418
				Zn2+	Activated	2.219	bias	0.00433
				ACSS2	Activated	2.236	bias	0.00433
				ascorbic acid	Activated	3.115		0.0046
				miR-141-3p (and other miRNAs w/seed AACACUG)	Inhibited	-2.043	bias	0.00461
				ELAVL1	Activated	2.285	bias	0.00463
				ATF6	Activated	2.789	bias	0.00493
				CL 316243	Activated	2.224	bias	0.00499
				SEMA7A	Activated	2.236	bias	0.0053
				CDKN1B	Inhibited	-2.711	bias	0.00569
				methyl methanesulfonate	Activated	2.393	bias	0.00641
				TF	Inhibited	-2.163	bias	0.00642
				MYCN	Inhibited	-2.831		0.00649
				KMT2D	Activated	2.056	bias	0.00715
				SOX3	Inhibited	-2.53	bias	0.00729
				MAF	Activated	2.952	bias	0.00737
				10-nitrooleate	Inhibited	-2	bias	0.00745
				C1q	Inhibited	-2	bias	0.00745
				FGF21	Activated	2.778		0.00794
				Smad2/3	Activated	2.449	bias	0.0081
				SENP3	Activated	2.646	bias	0.0082
				Notch	Activated	2.752		0.00861
				FFAR3	Inhibited	-2.538		0.00865
				asoprisnil	Inhibited	-2.433	bias	0.00903
				EPHA2	Activated	2.2		0.00913
				mir-9	Inhibited	-2.186	bias	0.00913
				miR-1-3p (and other miRNAs w/seed GGAAUGU)	Inhibited	-3.035	bias	0.00942
				mir-210	Inhibited	-2.025	bias	0.00958
				EHMT1	Activated	2.137	bias	0.0102
				PF543	Inhibited	-2.646	bias	0.0103
				ELF3	Activated	2.233	bias	0.0103
				POU2F2	Activated	3	bias	0.0103
				Irgm1	Inhibited	-2.354	bias	0.0111
				XBP1	Activated	2.309	bias	0.0113
				MIR17HG	Inhibited	-3.065	bias	0.0113
				NR2F1	Activated	2.2		0.0115
				ARHGDIG	Inhibited	-2	bias	0.0115
				SOX1	Inhibited	-2.333	bias	0.0116
				S-adenosylmethionine	Inhibited	-2.38	bias	0.0117
				GAPDH	Inhibited	-2.449		0.0117
				CpG ODN 2006	Activated	2.359	bias	0.0119
				H1-6	Activated	2.53	bias	0.0119
				H1f1	Activated	2.53	bias	0.0119
				GRIN3A	Inhibited	-2.309	bias	0.0134
				cadmium	Activated	2.764	bias	0.0137
				miR-503-5p (miRNAs w/seed AGCAGCG)	Inhibited	-2	bias	0.014
				8-chlorophenylthio-adenosine 3',5'-cyclic monophosphate	Activated	2.416	bias	0.0143
				miR-204-5p (and other miRNAs w/seed UCCCUUU)	Inhibited	-2.813	bias	0.0143
				carbohydrate	Activated	2.219	bias	0.0145
				ASXL2	Activated	2.236	bias	0.0145
				miR-133a-3p (and other miRNAs w/seed UUGGUCC)	Inhibited	-2.198	bias	0.0145
				NPC2	Inhibited	-2.2	bias	0.0145
				mir-25	Inhibited	-2.407	bias	0.015
				PRKCI	Activated	2.173	bias	0.0167
				PKNOX2	Activated	2	bias	0.0169
				EIF2AK3	Activated	2.613	bias	0.018
				isoprenaline	Activated	2	bias	0.0188
				carbamazepine	Activated	2.621	bias	0.0191
				TCF7L1	Inhibited	-2.236	bias	0.0191
				IFNE	Activated	2.449	bias	0.0209
				LIN28A	Activated	2.2	bias	0.0218
				selenomethylselenocysteine	Inhibited	-2	bias	0.0235
				ACVR1C	Activated	2	bias	0.0235
				FUT8	Inhibited	-2	bias	0.0235
				FLT1	Activated	2.828		0.0251
				CD5	Activated	2.621	bias	0.0251
				2-amino-1-methyl-6-phenylimidazo-4-5-b-pyridine	Activated	2.433	bias	0.0257
				EBI3	Activated	2.008	bias	0.0273
				Pkg	Activated	2	bias	0.0273
				ZAP70	Activated	2.611	bias	0.0297
				SAFB2	Inhibited	-2	bias	0.0315
				BNIP3L	Inhibited	-2.63		0.0322
				FEV	Activated	3	bias	0.0328
				miR-221-3p (and other miRNAs w/seed GCUACAU)	Inhibited	-2.211	bias	0.0345
				miR-92a-3p (and other miRNAs w/seed AUUGCAC)	Inhibited	-2.2	bias	0.0345
				ARNT2	Activated	2.668	bias	0.036
				TRH	Activated	2.169		0.0383
				EIF4E	Activated	3.046	bias	0.0404
				N-methyl-D-aspartate	Activated	2.046	bias	0.0405
				SGPP2	Inhibited	-2	bias	0.0409
