# Supplementary figures and images for: Beneficial Effect of Polysaccharide Gel Made of Xanthan Gum and Locust Bean Gum on Bovine Oocytes
Source: MDPI journal article supplement (doi:10.3390/ijms24043508), 2023-02-09

Figure S2

Cows derived from oocytes matured on the gel culture system.

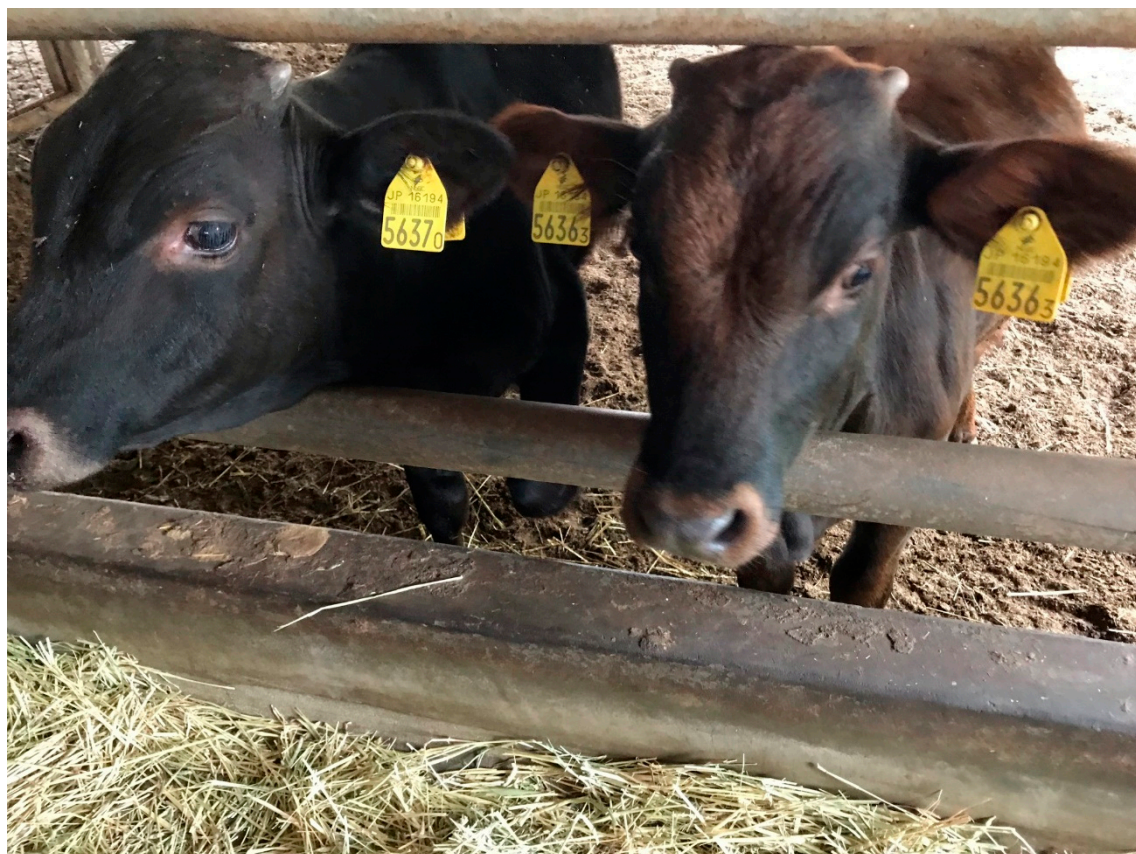

Supplement: s1 [file s1]
